# Supplementary material for: Epidemiological and clinical characteristics of the COVID-19 epidemic in Brazil
Source: Springer Nature journal article supplement (doi:10.1038/s41562-020-0928-4), 2020-07-31
Supplement: 41562_2020_928_MOESM3_ESM.pdf [file 41562_2020_928_MOESM3_ESM.pdf]

## Peer Review Information

---

**Journal:** Nature Human Behaviour

**Manuscript Title:** Epidemiological and clinical characteristics of the COVID-19 epidemic in Brazil

**Corresponding author name(s):** Nuno Rodrigues Faria & Julio Croda

### Editorial Notes:

|                                                                            |                                                                                                                                                                                                                                                    |
|----------------------------------------------------------------------------|----------------------------------------------------------------------------------------------------------------------------------------------------------------------------------------------------------------------------------------------------|
| <b>Transferred manuscripts (no peer review at Nature Human Behaviour)</b>  | This manuscript has been previously reviewed at another journal that is not operating a transparent peer review scheme. The manuscript was considered suitable for publication without further review at Nature Human Behaviour.                   |
| <b>Redactions – transferred manuscripts (mention of the other journal)</b> | This manuscript has been previously reviewed at another journal. This document only contains reviewer comments, rebuttal and decision letters for versions considered at Nature Human Behaviour. Mentions of the other journal have been redacted. |

### Reviewer Comments & Decisions:

|                                          |
|------------------------------------------|
| <b>Decision Letter, initial version:</b> |
|------------------------------------------|

Dear Nuno,

Thank you once again for transferring your manuscript, entitled "Epidemiological and clinical characteristics of the COVID-19 epidemic in Brazil," from **[REDACTED]** to Nature Human Behaviour.

In the light of the feedback provided by the three reviewers in the second round of review at **[REDACTED]**, I am delighted to say that we can in principle offer to publish your work. First, however, we would like you to revise your paper to address the two outstanding points made by Reviewer 1, and to ensure that it complies with our Guide to Authors at <http://www.nature.com/nathumbehav/info/gta>.

One of the main reasons for delays in formal acceptance is failure to fully comply with editorial policies and formatting requirements. To assist you with finalizing your manuscript for publication, I attach a checklist that lists all of our editorial policies and formatting requirements.

Please attend to *\*every item\** in the checklist and upload a copy of the completed checklist with your

submission. I realize that this is quite a long and detailed list - please don't hesitate to contact me if you have any questions. I also mention here a few points that are frequently missed and can cause delays:

1) Ensure that all corresponding authors have linked their ORCID to their account on our online manuscript handling system. This is very frequently missed and invariably causes delays in formal acceptance.

2) Ensure that you provide all of the materials requested in the attached checklist and below with your final submission. Please note that the Licence to Publish needs to be hand-signed.

We hope to hear from you as soon as possible (and will prioritize your manuscript for processing upon receipt); please let us know if you envision any delays in the submission of the finalized work.

To submit your revised manuscript, you will need to provide the following:

- Cover letter
- Point-by-point response to the reviewers from the second round of review at **[REDACTED]**
- Manuscript text (not including the figures) in .docx or .tex format
- Individual figure files (one figure per file)
- Extended Data & Supplementary Information, as instructed
- Reporting summary
- Editorial policy checklist
- License to publish
- Third-party rights table (if applicable)
- Suggestions for cover illustrations (if desired)

Please use the following link for uploading these materials:

**[REDACTED]**

If you have any further questions, please feel free to contact me.

With best regards,

Stavroula

Stavroula Kousta, PhD  
Chief Editor  
Nature Human Behaviour

**Final Decision Letter:**

Dear Nuno,

Many thanks for addressing all outstanding comments and requests. Everything is now in order and I

am very pleased to inform you that your Article "Epidemiological and clinical characteristics of the COVID-19 epidemic in Brazil", has now been accepted for publication in Nature Human Behaviour.

Before your manuscript is typeset, we will edit the text to ensure it is intelligible to our wide readership and conforms to house style. We look particularly carefully at the titles of all papers to ensure that they are relatively brief and understandable.

The subeditor may send you the edited text for your approval. Once your manuscript is typeset you will receive a link to your electronic proof via email within 20 working days, with a request to make any corrections within 48 hours. If you have queries at any point during the production process then please contact the production team at [rjsproduction@springernature.com](mailto:rjsproduction@springernature.com). Once your paper has been scheduled for online publication, the Nature press office will be in touch to confirm the details.

Acceptance of your manuscript is conditional on all authors' agreement with our publication policies (see <http://www.nature.com/nathumbehav/info/gta>). In particular your manuscript must not be published elsewhere and there must be no announcement of the work to any media outlet until the publication date (the day on which it is uploaded onto our web site).

The Author's Accepted Manuscript (the accepted version of the manuscript as submitted by the author) may only be posted 6 months after the paper is published, consistent with our [self-archiving embargo](#). Please note that the Author's Accepted Manuscript may not be released under a Creative Commons license. For Nature Research Terms of Reuse of archived manuscripts please see: <http://www.nature.com/authors/policies/license.html#terms>

If you have posted a preprint on any preprint server, please ensure that the preprint details are updated with a publication reference, including the DOI and a URL to the published version of the article on the journal website.

An online order form for reprints of your paper is available at <https://www.nature.com/reprints/author-reprints.html>. All co-authors, authors' institutions and authors' funding agencies can order reprints using the form appropriate to their geographical region.

We welcome the submission of potential cover material (including a short caption of around 40 words) related to your manuscript; suggestions should be sent to Nature Human Behaviour as electronic files (the image should be 300 dpi at 210 x 297 mm in either TIFF or JPEG format). Please note that such pictures should be selected more for their aesthetic appeal than for their scientific content, and that colour images work better than black and white or grayscale images. Please do not try to design a cover with the Nature Human Behaviour logo etc., and please do not submit composites of images related to your work. I am sure you will understand that we cannot make any promise as to whether any of your suggestions might be selected for the cover of the journal.

You can now use a single sign-on for all your accounts, view the status of all your manuscript submissions and reviews, access usage statistics for your published articles and download a record of your refereeing activity for the Nature journals.

To assist our authors in disseminating their research to the broader community, our SharedIt initiative provides you with a unique shareable link that will allow anyone (with or without a subscription) to read the published article. Recipients of the link with a subscription will also be able to download and

print the PDF.

As soon as your article is published, you will receive an automated email with your shareable link.

We look forward to publishing your paper.

With all best wishes,

Stavroula

Stavroula Kousta, PhD  
Chief Editor  
Nature Human Behaviour
